# Supplementary material for: MnII, CuII and CoII coordination polymers showing antiferromagnetism, and the coexistence of spin frustration and long range magnetic ordering
Source: Royal Society of Chemistry journal article supplement (doi:10.1039/c3ce41046c), 2013-01-01
Supplement: c3ce41046c.pdf [file c3ce41046c.pdf]

# Supporting information

## **Mn<sup>II</sup>, Cu<sup>II</sup> and Co<sup>II</sup> coordination polymers showing antiferromagnetism, coexistence of spin frustration and long range magnetic ordering**

*Ya-Min Li<sup>a\*</sup>, Chang-Yu Xiao<sup>a</sup>, Xu-Dong Zhang<sup>b</sup>, Yan-Qing Xu<sup>c</sup>, Hui-Jie Lun<sup>a</sup>, Jing-Yang Niu<sup>a\*</sup>*

<sup>a</sup> Henan Key Laboratory of Polyoxometalate; Institute of Molecular and Crystal Engineering, College of Chemistry and Chemical Engineering, Henan University, Kaifeng, Henan 475004, PR China; E-mail: liyamin@henu.edu.cn

<sup>b</sup> State Key Laboratory of Structural Chemistry, Fujian Institute of Research on the Structure of Matter, Chinese Academy of Sciences, Fuzhou, Fujian 350002, PR China

<sup>c</sup> School of Chemistry, Key Laboratory of Cluster Science, Ministry of Education of China, Beijing Institute of Technology, Beijing, 100081, PR China

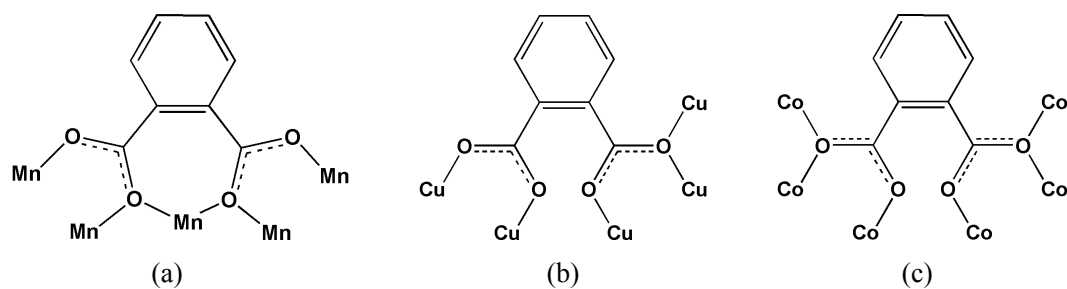

Scheme S1 Different coordination modes of the ligand 1,2- $\text{bdc}^{2-}$  (a) in complex **1**, (b) in complex **2** and (c) in complex **3**.

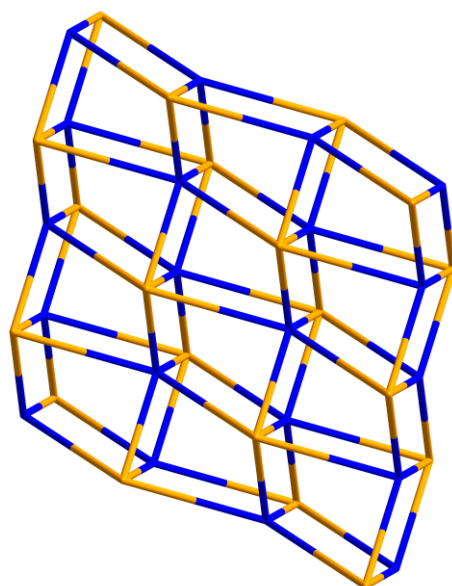

**Fig. S1** A five-connected 2D network with point symbol of  $\{4^8.6^2\}$  in **1** with  $\text{Mn}^{\text{II}}$  being represented as blue balls and the ligand  $\text{bdc}^{2-}$  as orange balls..

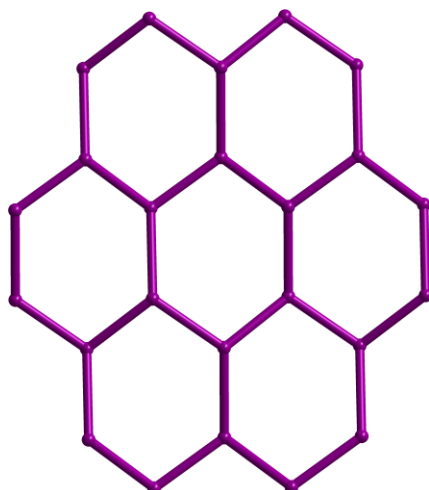

**Fig. S2** A 3-connected **hcb** topological net in **3** with  $\text{Co}_3(\text{OH})$  being represented by purple balls.

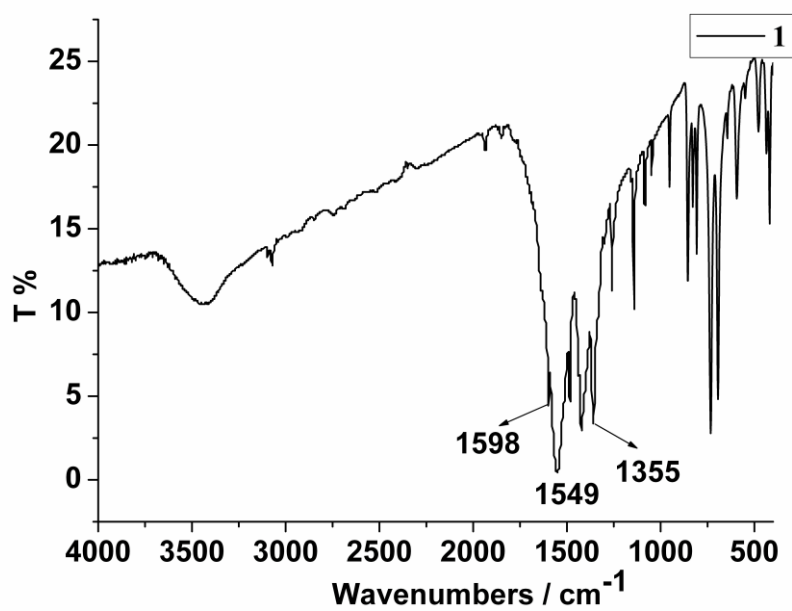

(a)

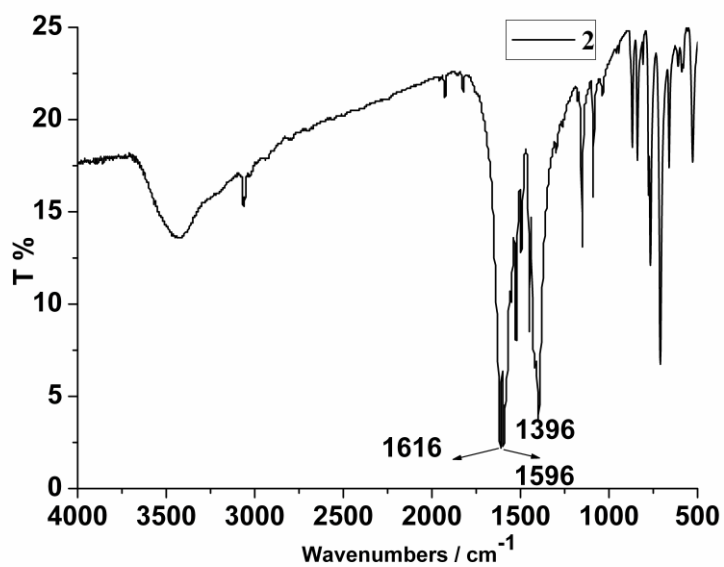

(b)

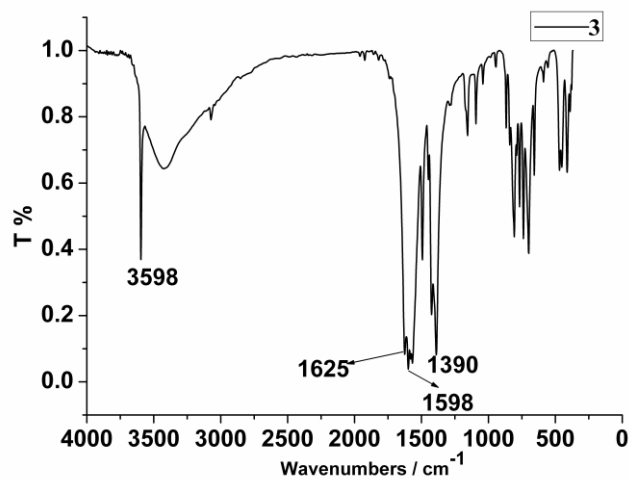

(c)

Fig. S3 IR spectra for three compounds.

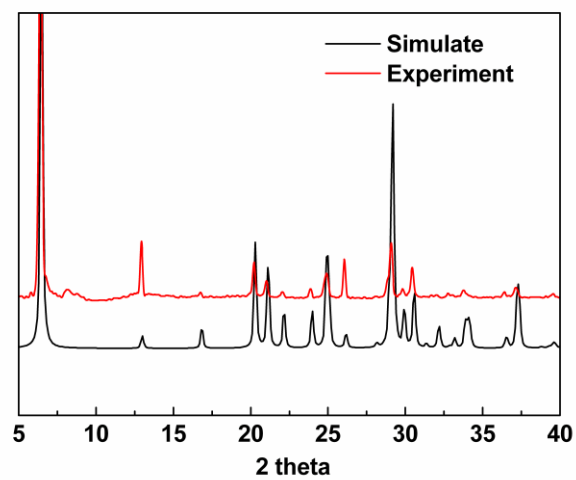

(a)

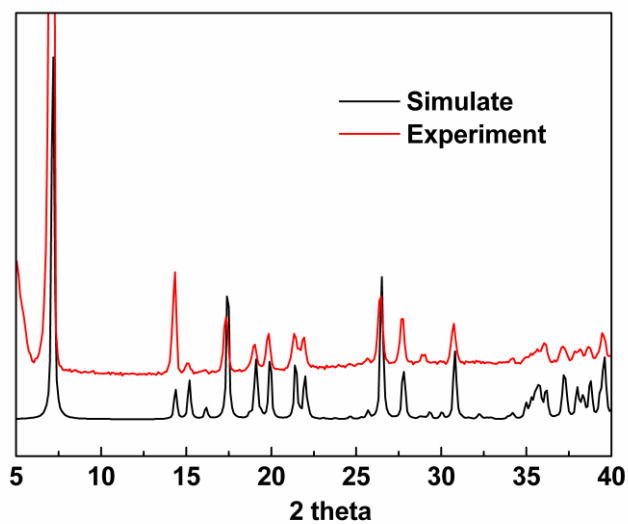

(b)

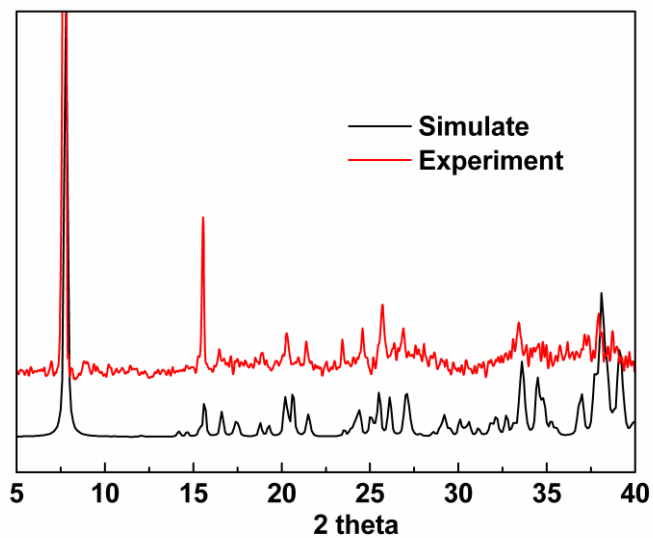

(c)

Fig. S4 PXR D curves for (a) 1, (b) 2, (c) 3.

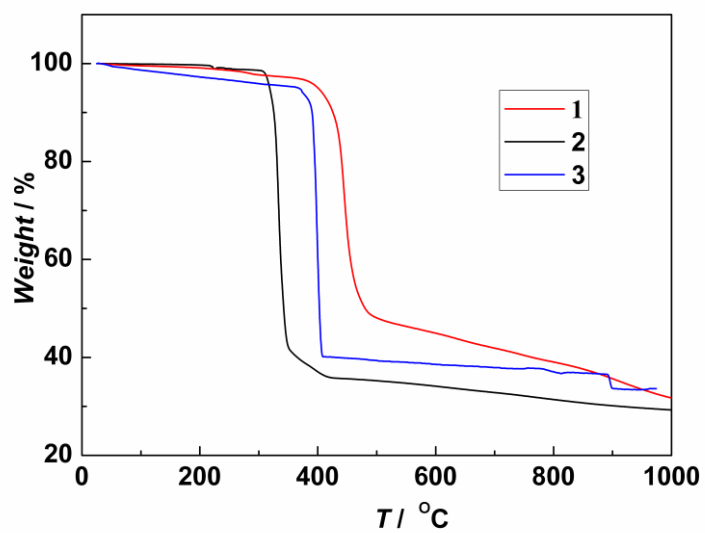

Fig. S5 TGA curves for three compounds.

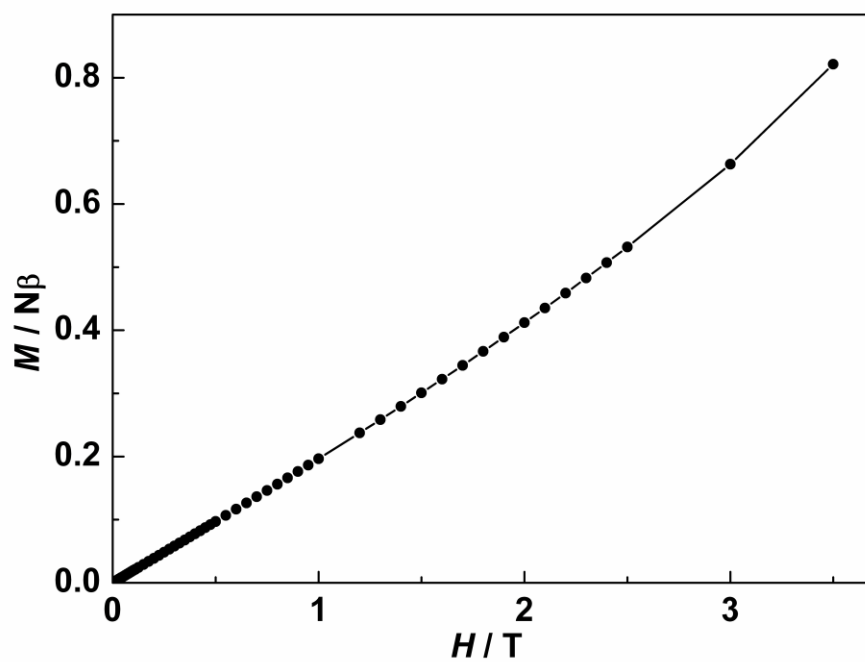

Fig. S6 The curve of magnetization vs. applied fields at 2 K in 1.

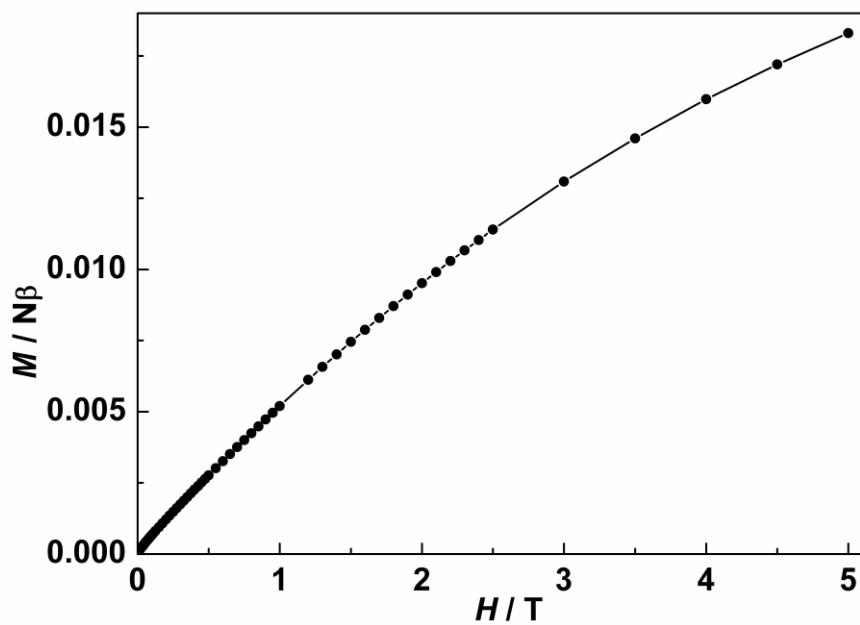

Fig. S7 The curve of magnetization vs. applied fields at 2 K in 2.

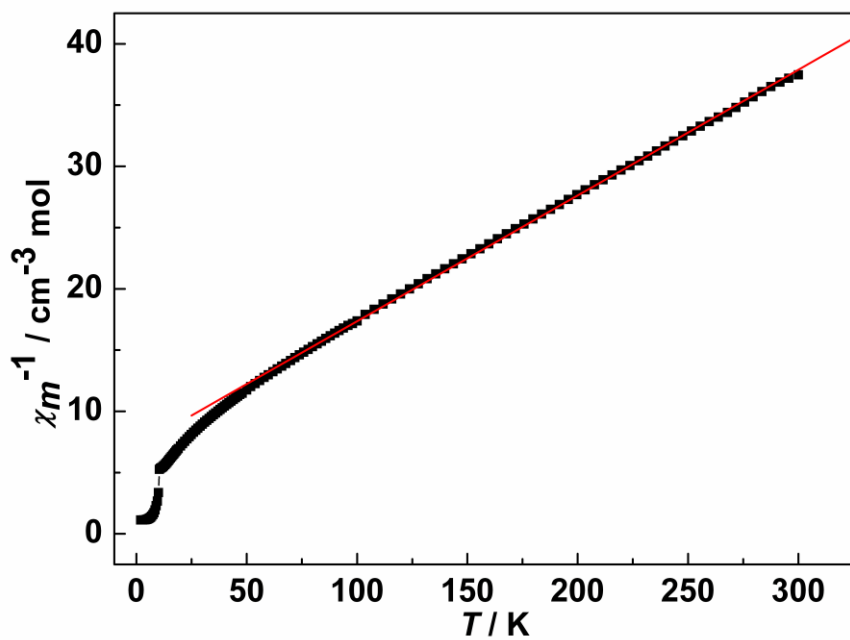

**Fig. S8** The  $\chi_m^{-1}$  vs.  $T$  plot of **3** in the range 2-300 K at 1 kOe. The solid line is the best-fit above 50 K according to the Curie-Weiss law.

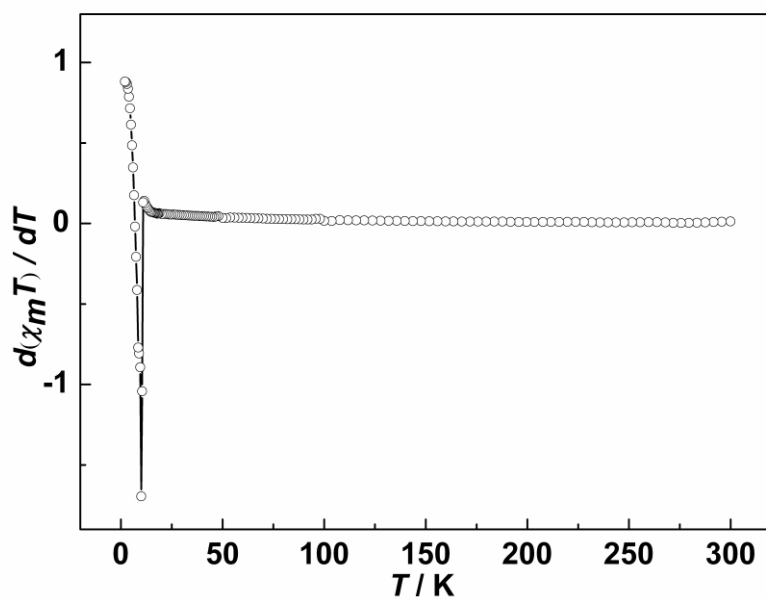

**Fig. S9** The  $d(\chi_m T) / dT$  derivative curve of **3**.



**Table S1** Crystallographic data for compound **1~3**.

|                                                      | <b>1</b>                                                           | <b>2</b>                                                           | <b>3</b>                                                           |
|------------------------------------------------------|--------------------------------------------------------------------|--------------------------------------------------------------------|--------------------------------------------------------------------|
| Empirical formula                                    | C <sub>8</sub> H <sub>4</sub> MnO <sub>4</sub>                     | C <sub>8</sub> H <sub>4</sub> CuO <sub>4</sub>                     | C <sub>16</sub> H <sub>10</sub> Co <sub>3</sub> O <sub>10</sub>    |
| Formula weight                                       | 219.05                                                             | 227.65                                                             | 539.03                                                             |
| Crystal system                                       | Monoclinic                                                         | Monoclinic                                                         | Monoclinic                                                         |
| Space group                                          | <i>P2/c</i>                                                        | <i>P2<sub>1</sub>/c</i>                                            | <i>P2<sub>1</sub>/c</i>                                            |
| Unit cell dimensions                                 |                                                                    |                                                                    |                                                                    |
| <i>a</i> (Å)                                         | 4.664(2)                                                           | 13.171(5)                                                          | 11.648(2)                                                          |
| <i>b</i> (Å)                                         | 13.625(6)                                                          | 5.1292(18)                                                         | 12.091(3)                                                          |
| <i>c</i> (Å)                                         | 6.339(2)                                                           | 11.719(4)                                                          | 11.846(3)                                                          |
| <i>B</i> (°)                                         | 115.82(3)                                                          | 110.745(6)                                                         | 103.245(4)                                                         |
| <i>V</i> (Å <sup>3</sup> )                           | 362.6(3)                                                           | 740.3(5)                                                           | 1624.0(6)                                                          |
| <i>Z</i>                                             | 2                                                                  | 4                                                                  | 4                                                                  |
| $\rho$ calcd.(Mg/m <sup>3</sup> )                    | 2.006                                                              | 2.042                                                              | 2.205                                                              |
| $\mu$ (mm <sup>-1</sup> )                            | 1.790                                                              | 2.920                                                              | 3.090                                                              |
| F(000)                                               | 218                                                                | 452                                                                | 1068                                                               |
| $\theta$ limits (°)                                  | 2.99 to 24.99 deg                                                  | 1.65 to 25.00                                                      | 1.80 to 25.00                                                      |
| <i>h, k, l</i> limits                                | -5 to 5, -15 to 16,<br>-7 to 7                                     | -13 to 15, -3 to 6,<br>-13 to 13                                   | -13 to 12, -14 to 13,<br>-14 to 13                                 |
| Reflections collected                                | 2341                                                               | 3523                                                               | 7928                                                               |
| GOOF                                                 | 1.218                                                              | 1.064                                                              | 0.966                                                              |
| <i>R</i> index [ <i>I</i> > 2 $\sigma$ ( <i>I</i> )] | <i>R</i> <sub>1</sub> = 0.0435, <i>wR</i> <sub>2</sub><br>= 0.1193 | <i>R</i> <sub>1</sub> = 0.0444, <i>wR</i> <sub>2</sub><br>= 0.1070 | <i>R</i> <sub>1</sub> = 0.0409, <i>wR</i> <sub>2</sub> =<br>0.1045 |
| <i>R</i> (all data)                                  | <i>R</i> <sub>1</sub> = 0.0459, <i>wR</i> <sub>2</sub><br>= 0.1199 | <i>R</i> <sub>1</sub> = 0.0535, <i>wR</i> <sub>2</sub><br>= 0.1106 | <i>R</i> <sub>1</sub> = 0.0601, <i>wR</i> <sub>2</sub> =<br>0.1136 |
| Largest diff. peak and hole (e·Å <sup>-3</sup> )     | 1.162 and -0.487                                                   | 1.357 and -0.781                                                   | 1.394 and -0.757                                                   |

$${}^a R = \frac{\sum(|F_o| - |F_c|)}{\sum|F_o|}, {}^b wR = \left\{ \frac{\sum w[(F_o^2 - F_c^2)^2]}{\sum w(F_o^2)^2} \right\}^{1/2}, w = 1/[\sigma^2(F_o^2) + (aP)^2 + bP], P = (F_o^2 + 2F_c^2)/3. \mathbf{1}, a = 0.0694, b = 0.5648; \mathbf{2}, a = 0.0653, b = 0.5533; \mathbf{3}, a = 0.0722, b = 0.0000.$$

**Table S2** Selected bond lengths and bond angles for compound **1-3**.

| <b>1</b>            |            |                     |            |
|---------------------|------------|---------------------|------------|
| Mn(1)-O(2)#1        | 2.114(3)   | Mn(1)-O(1)#3        | 2.170(3)   |
| Mn(1)-O(1)          | 2.243(3)   | Mn(1)-Mn(1)#4       | 3.4812(11) |
| O(2)#1-Mn(1)-O(2)#2 | 101.03(15) | O(2)#1-Mn(1)-O(1)#3 | 154.82(10) |
| O(2)#2-Mn(1)-O(1)#3 | 94.47(10)  | O(1)#3-Mn(1)-O(1)#4 | 78.78(13)  |
| O(2)#1-Mn(1)-O(1)   | 87.13(10)  | O(2)#2-Mn(1)-O(1)   | 85.16(10)  |
| O(1)#3-Mn(1)-O(1)   | 114.08(10) | O(1)#4-Mn(1)-O(1)   | 75.85(10)  |
| O(1)-Mn(1)-O(1)#5   | 167.86(13) |                     |            |
| <b>2</b>            |            |                     |            |
| Cu(1)-O(2)          | 1.935(3)   | Cu(1)-O(1)          | 1.953(3)   |
| Cu(1)-O(3)          | 1.957(3)   | Cu(1)-O(4)          | 2.033(3)   |
| Cu(1)-O(4)#1        | 2.204(3)   | Cu(1)-Cu(1)#2       | 2.6229(12) |
| O(2)-Cu(1)-O(1)     | 168.68(14) | O(2)-Cu(1)-O(3)     | 86.24(14)  |
| O(1)-Cu(1)-O(3)     | 91.67(14)  | O(2)-Cu(1)-O(4)     | 88.61(14)  |
| O(1)-Cu(1)-O(4)     | 91.25(13)  | O(3)-Cu(1)-O(4)     | 167.96(13) |
| O(2)-Cu(1)-O(4)#1   | 90.46(13)  | O(1)-Cu(1)-O(4)#1   | 100.65(13) |
| O(3)-Cu(1)-O(4)#1   | 111.33(12) |                     |            |
| <b>3</b>            |            |                     |            |
| Co(1)-O(10)         | 2.005(3)   | Co(2)-O(9)#4        | 2.082(3)   |
| Co(1)-O(9)          | 2.007(3)   | Co(2)-O(10)         | 2.088(3)   |
| Co(1)-O(6)          | 2.060(3)   | Co(2)-O(4)#1        | 2.104(3)   |
| Co(1)-O(1)#1        | 2.064(3)   | Co(2)-O(5)          | 2.106(3)   |
| Co(1)-O(3)#2        | 2.345(3)   | Co(2)-O(7)#4        | 2.109(3)   |
| Co(1)-O(8)#3        | 2.367(3)   | Co(2)-O(2)          | 2.109(3)   |
| Co(3)-O(9)          | 2.088(3)   | Co(4)-O(10)         | 2.082(3)   |
| Co(3)-O(5)#1        | 2.098(3)   | Co(4)-O(2)          | 2.091(3)   |
| Co(3)-O(3)#2        | 2.099(3)   | Co(4)-O(8)#3        | 2.118(3)   |
| O(10)-Co(1)-O(9)    | 173.73(12) | O(9)#4-Co(2)-O(10)  | 179.07(12) |
| O(10)-Co(1)-O(6)    | 95.72(12)  | O(9)#4-Co(2)-O(4)#1 | 86.27(12)  |
| O(9)-Co(1)-O(6)     | 88.19(12)  | O(10)-Co(2)-O(4)#1  | 92.91(12)  |
| O(10)-Co(1)-O(1)#1  | 88.58(13)  | O(9)#4-Co(2)-O(5)   | 78.87(11)  |
| O(9)-Co(1)-O(1)#1   | 95.66(13)  | O(10)-Co(2)-O(5)    | 101.61(11) |
| O(6)-Co(1)-O(1)#1   | 99.01(14)  | O(4)#1-Co(2)-O(5)   | 93.22(12)  |
| O(10)-Co(1)-O(3)#2  | 101.28(11) | O(9)#4-Co(2)-O(7)#4 | 92.99(12)  |
| O(9)-Co(1)-O(3)#2   | 74.79(11)  | O(10)-Co(2)-O(7)#4  | 86.66(12)  |
| O(6)-Co(1)-O(3)#2   | 162.97(12) | O(4)#1-Co(2)-O(7)#4 | 95.13(12)  |
| O(1)#1-Co(1)-O(3)#2 | 82.59(13)  | O(5)-Co(2)-O(7)#4   | 167.93(12) |
| O(10)-Co(1)-O(8)#3  | 74.81(12)  | O(9)#4-Co(2)-O(2)   | 102.09(12) |
| O(9)-Co(1)-O(8)#3   | 100.88(12) | O(10)-Co(2)-O(2)    | 78.79(12)  |
| O(6)-Co(1)-O(8)#3   | 83.18(13)  | O(4)#1-Co(2)-O(2)   | 167.42(12) |

---

|                     |            |                     |            |
|---------------------|------------|---------------------|------------|
| O(1)#1-Co(1)-O(8)#3 | 163.38(12) | O(5)-Co(2)-O(2)     | 79.39(12)  |
| O(3)#2-Co(1)-O(8)#3 | 100.17(11) | O(7)#4-Co(2)-O(2)   | 93.81(12)  |
| O(9)#5-Co(3)-O(9)   | 180.00(12) | O(10)-Co(4)-O(10)#2 | 180.00(13) |
| O(9)-Co(3)-O(5)#1   | 78.92(11)  | O(10)-Co(4)-O(2)#2  | 100.67(11) |
| O(9)-Co(3)-O(5)#3   | 101.08(11) | O(10)-Co(4)-O(2)    | 79.33(11)  |
| O(5)#1-Co(3)-O(5)#3 | 180.0      | O(10)#2-Co(4)-O(2)  | 100.67(11) |
| O(9)-Co(3)-O(3)#6   | 101.24(12) | O(2)#2-Co(4)-O(2)   | 180.00(8)  |
| O(5)#1-Co(3)-O(3)#6 | 81.72(12)  | O(10)-Co(4)-O(8)#3  | 78.96(12)  |
| O(9)-Co(3)-O(3)#2   | 78.76(12)  | O(2)-Co(4)-O(8)#3   | 98.27(12)  |
| O(5)#1-Co(3)-O(3)#2 | 98.28(12)  | O(10)-Co(4)-O(8)#4  | 101.04(12) |
| O(5)#3-Co(3)-O(3)#2 | 81.72(12)  | O(2)-Co(4)-O(8)#4   | 81.73(12)  |
| O(3)#6-Co(3)-O(3)#2 | 180.0      | O(8)#3-Co(4)-O(8)#4 | 180.00(9)  |

---

Symmetry transformations used to generate equivalent atoms: 1: #1  $x-1, y, z$ ; #2  $-x+1, y, -z+3/2$ ; #3  $x, -y+1, z+1/2$ ; #4  $-x, -y+1, -z+1$ ; #5  $-x, y, -z+3/2$ ; 2, #1  $-x+1, -y+3, -z+1$ ; #2  $-x+1, -y+2, -z+1$ ; 3, #1  $-x, y+1/2, -z+1/2$ ; #2  $-x, -y, -z+1$ ; #3  $x, -y+1/2, z+1/2$ ; #4  $-x, y-1/2, -z+1/2$ ; #5  $-x, -y+1, -z+1$ ; #6  $x, y+1, z$ .
